# Supplementary material for: Riding the wave of genomics, to investigate aquatic coliphage diversity and activity
Source: bioRxiv or medRxiv preprint supplement (doi:10.1101/476168), 2018-11-23

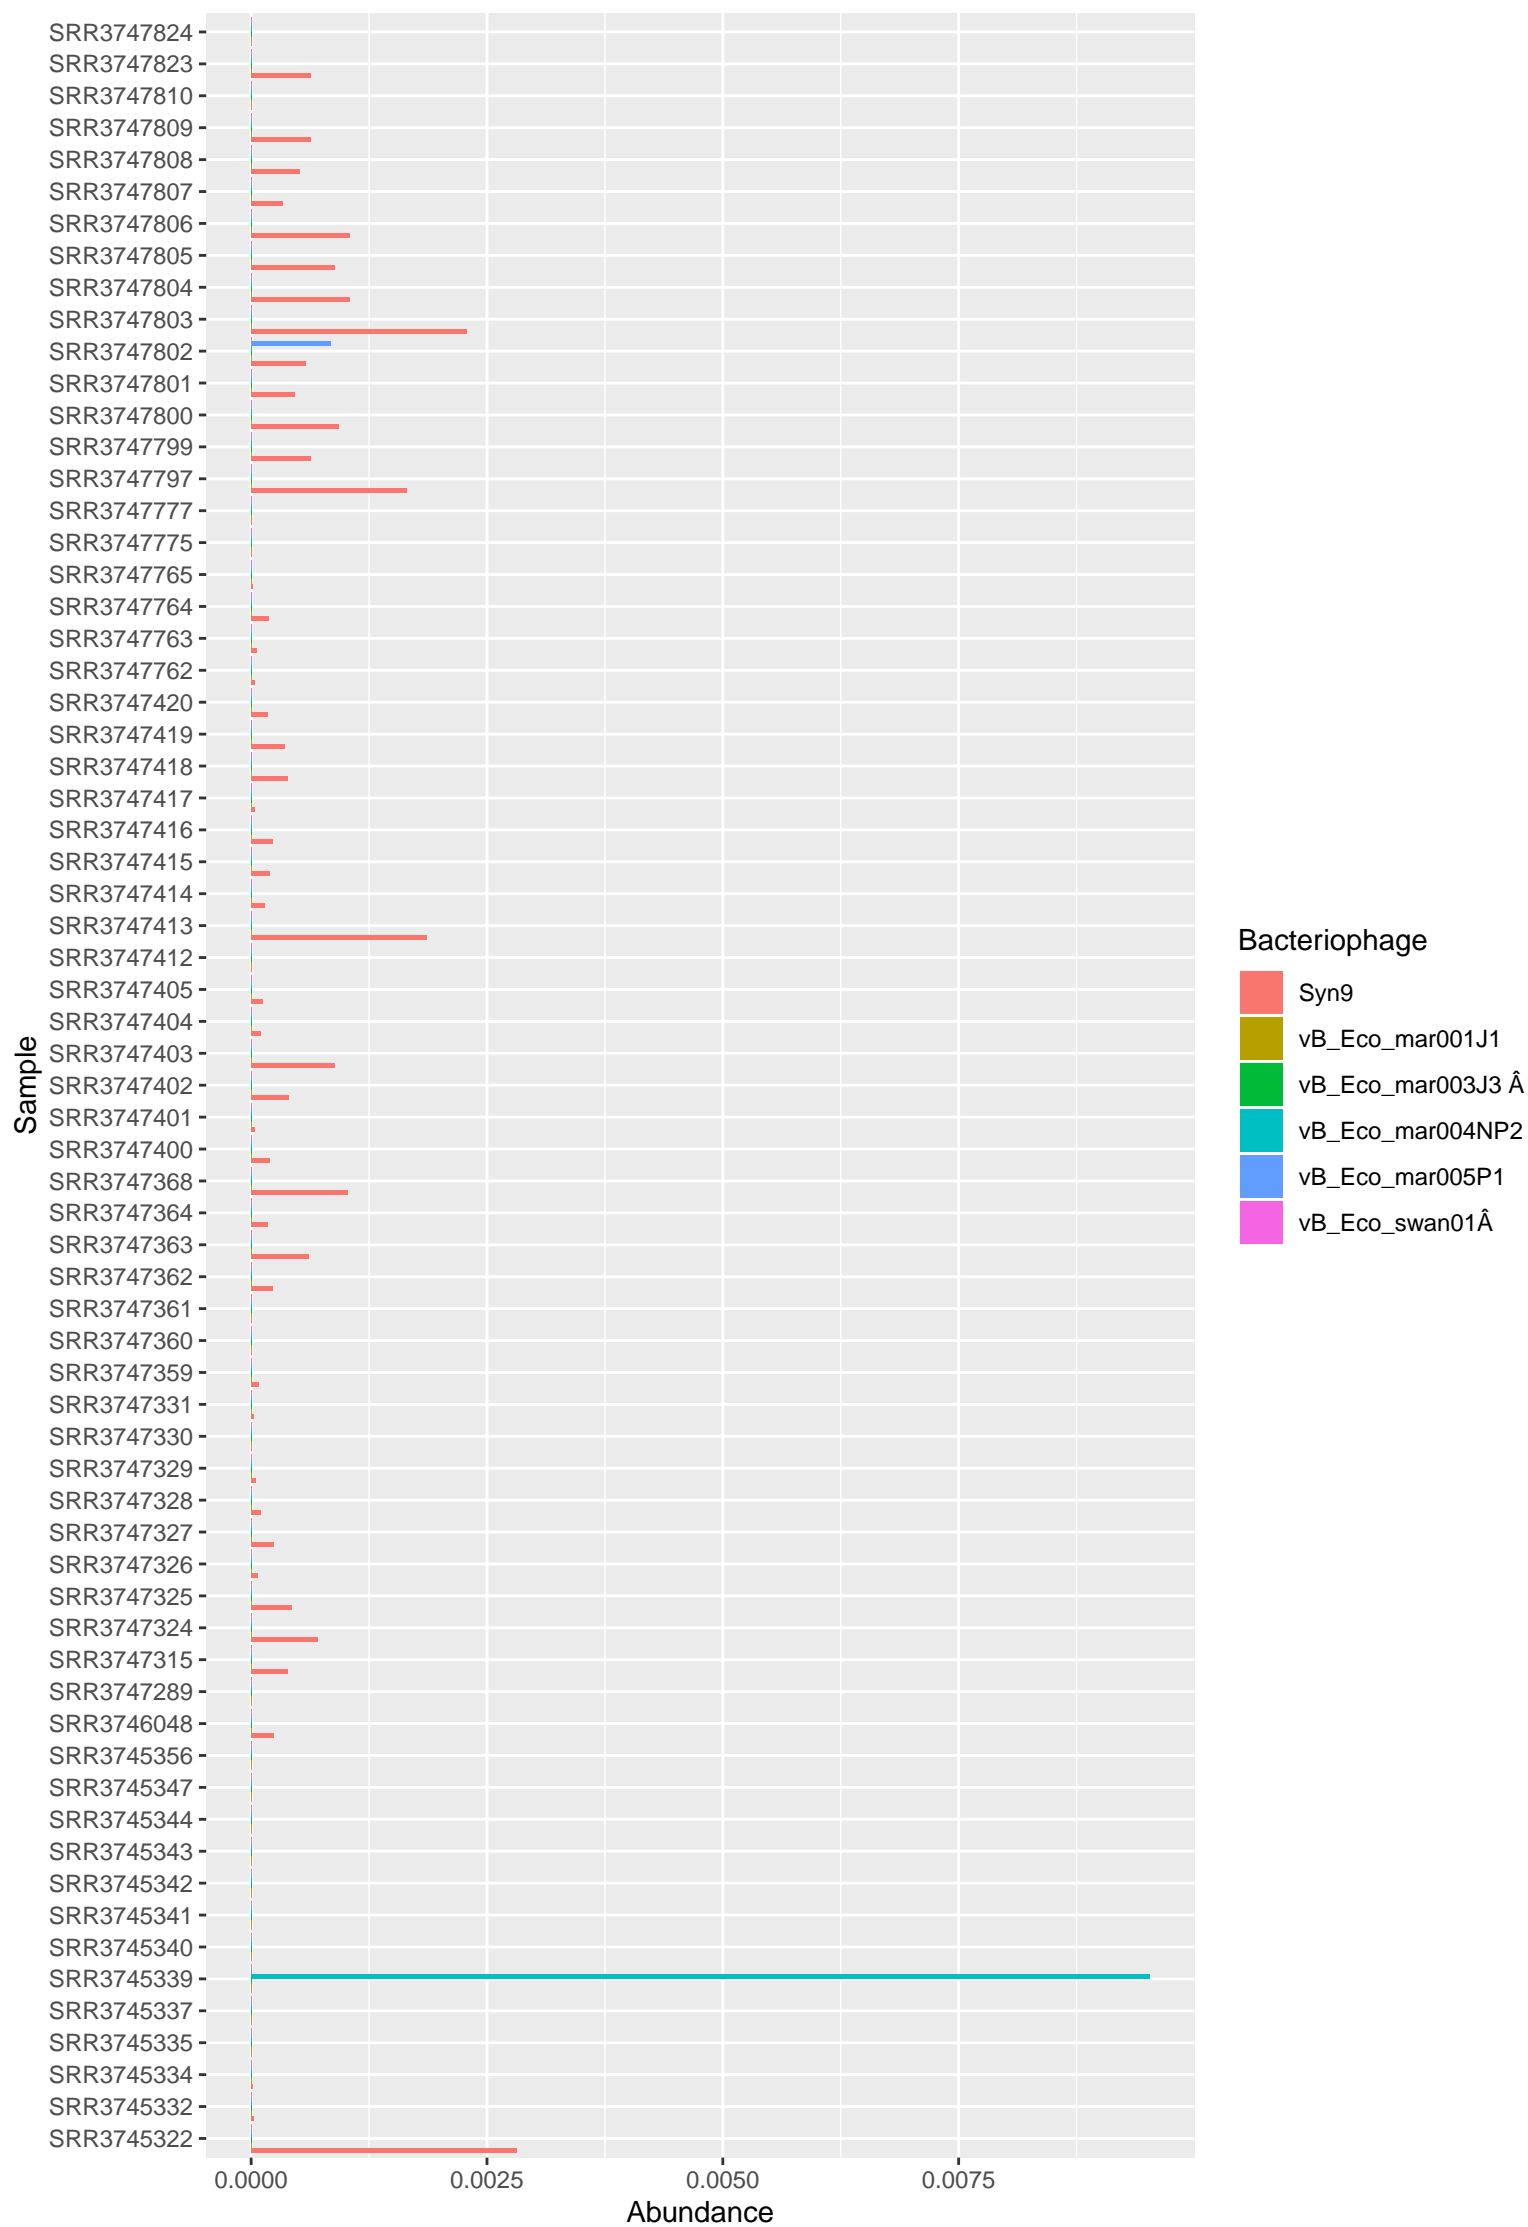

Supplement: Supplementary file [file media-5.pdf]
